# Supplementary material for: Live cell screening platform identifies PPARδ as a regulator of cardiomyocyte proliferation and cardiac repair
Source: PubMed Central journal article supplement (PMC5539351; doi:10.1038/cr.2017.84), 2017-06-16
Supplement: cr201784x1.pdf [file cr201784x1.pdf]

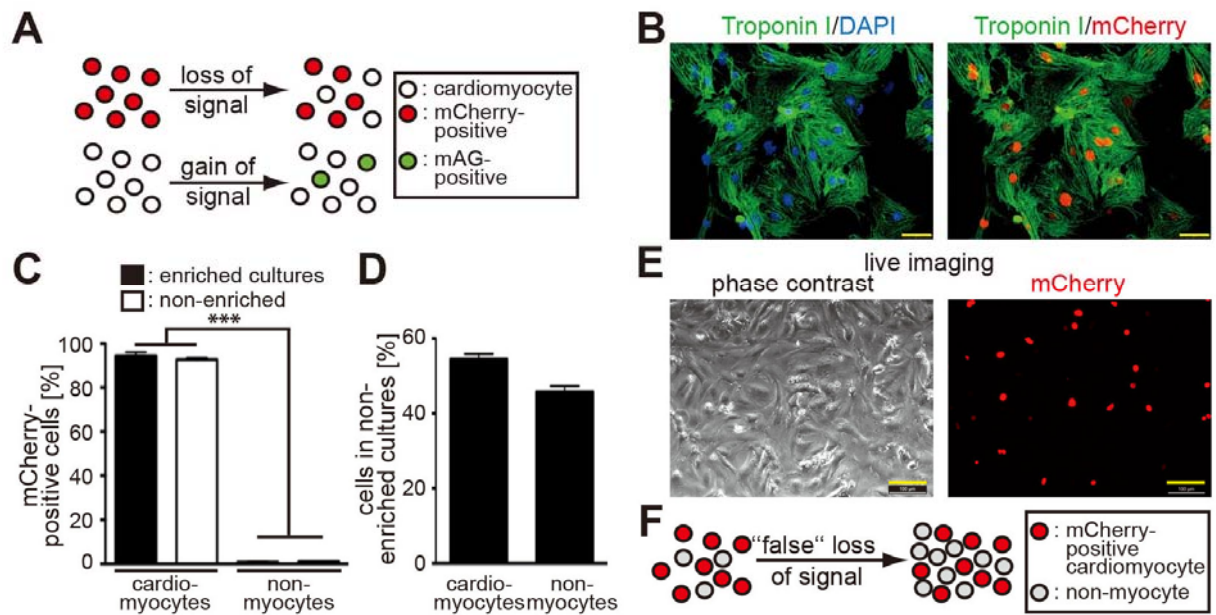

**Supplementary information, Figure S1** Screening strategy. **(A)** Schematic representation of possible screening approaches in which induction of proliferation is associated with a loss or gain of signal. **(B)** Representative example for enriched (1 h preplating) P3 rat cardiomyocyte cultures infected with Ad-mCherry-hCdt1(30/120) stained for mCherry expression (red) and counterstained against cardiomyocyte-specific Troponin I (green). DAPI was used to visualize nuclei (blue). **(C)** Quantitative analysis of mCherry-positive cells in enriched and non-enriched (no preplating) cardiomyocyte cultures ( $n = 6$ ). **(D)** Quantitative analysis of cardiomyocytes and non-myocytes in non-enriched cultures ( $n = 4$ ). **(E)** Representative live pictures of a control neonatal cardiomyocyte culture infected with Ad-mCherry-hCdt1(30/120) (red). **(F)** Schematic representation of the effect of drugs inducing non-myocyte proliferation mocking loss of signal.
