# Supplementary material for: Live cell screening platform identifies PPARδ as a regulator of cardiomyocyte proliferation and cardiac repair
Source: PubMed Central journal article supplement (PMC5539351; doi:10.1038/cr.2017.84), 2017-06-16
Supplement: cr201784x7.pdf [file cr201784x7.pdf]

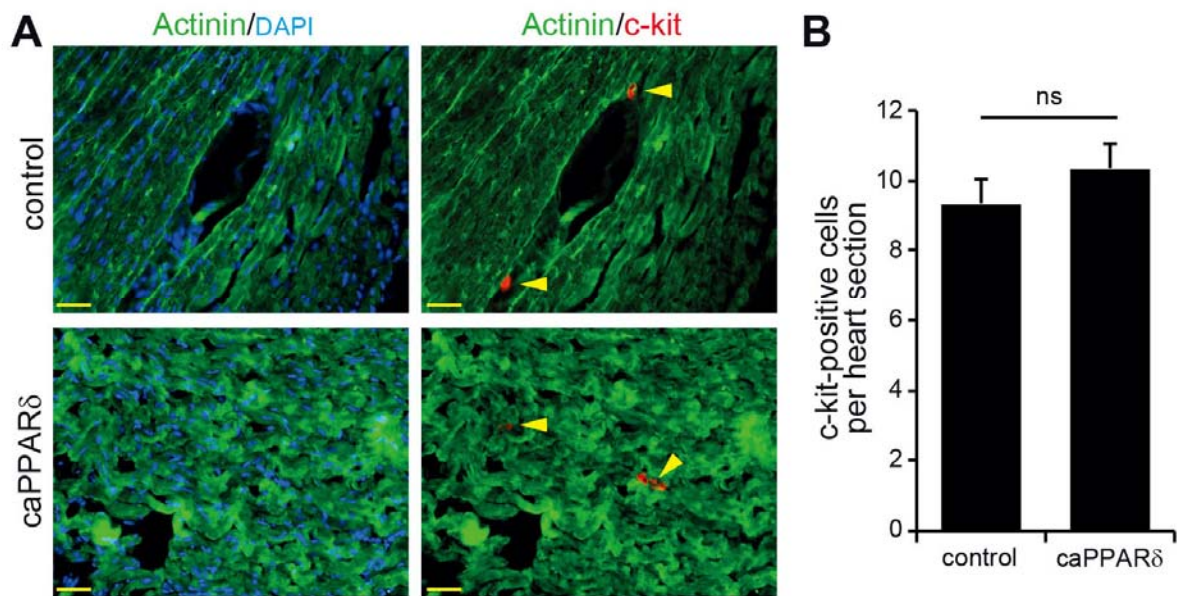

**Supplementary information, Figure S7** Activation of caPPAR $\delta$  does not induce an increase in c-kit<sup>+</sup> cells *in vivo* after MI. Cardiomyocyte-restricted overexpression of a constitutively active PPAR $\delta$  was induced in adult mice utilizing TMVPD mice via tamoxifen injections (caPPAR $\delta$ ). One week after tamoxifen injection, MI was induced via LAD ligation and hearts were analyzed two weeks later. **(A)** Representative heart sections from caPPAR $\delta$  mice and control mice (TMCM) stained for c-kit, Actinin and nuclei (DAPI). **(B)** Quantitative analysis of c-kit<sup>+</sup> cells ( $n = 4$ ,  $**P < 0.01$ ). Scale bar = 25  $\mu\text{m}$ . ns: not significant.
