# Supplementary material for: Live cell screening platform identifies PPARδ as a regulator of cardiomyocyte proliferation and cardiac repair
Source: PubMed Central journal article supplement (PMC5539351; doi:10.1038/cr.2017.84), 2017-06-16
Supplement: cr201784x8.pdf [file cr201784x8.pdf]

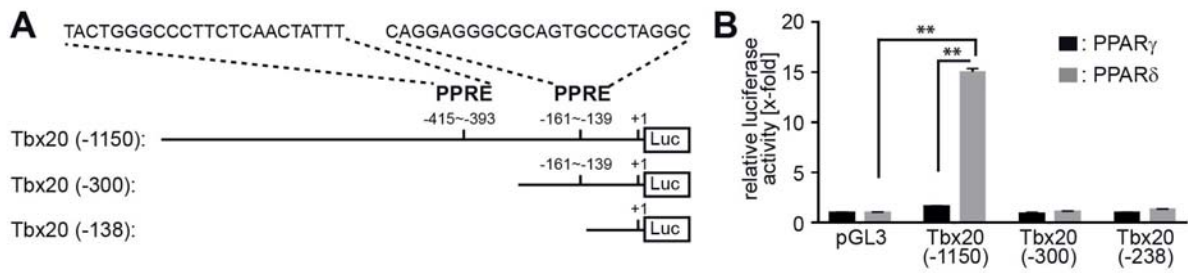

**Supplementary information, Figure S8** PPAR $\delta$  regulates Tbx20 expression at the transcriptional level. **(A)** Scheme of tested Tbx20 promoter reporter constructs. **(B)** PPAR $\delta$ -induced transcriptional activation of a series of Tbx20 promoter reporter constructs in the pGL3-Basic plasmid for luciferase reporter assays. The Tbx20 promoter luciferase activities were normalized to renilla luciferase activities. **\*\*** $P < 0.01$ .  $n = 3$ .
