# Supplementary material for: Live cell screening platform identifies PPARδ as a regulator of cardiomyocyte proliferation and cardiac repair
Source: PubMed Central journal article supplement (PMC5539351; doi:10.1038/cr.2017.84), 2017-06-16
Supplement: cr201784x10.pdf [file cr201784x10.pdf]

## Magadam *et al.* Table S1

### Screening results

| No. compounds                       | time [h]     | 12       | 24       | 36       | 48       | 60       | 72       | 84       | 96       |
|-------------------------------------|--------------|----------|----------|----------|----------|----------|----------|----------|----------|
| <b>1 DMSO</b>                       |              | <b>0</b> | <b>0</b> | <b>1</b> | <b>1</b> | <b>0</b> | <b>1</b> | <b>0</b> | <b>0</b> |
| 2 25-Hydroxyvitamin D3              | 10 nm        | 1        | 1        | 1        | 1        | 1        | 0        | 0        | 0        |
|                                     | 250 nm       | 1        | 1        | 1        | 1        | 0        | 1        | 0        | 0        |
|                                     | 30 µM        | 1        | 1        | 1        | 1        | 0        | 0        | 0        | 0        |
| <b>3 Retinoic acid, all trans</b>   | <b>10 nm</b> | <b>1</b> | <b>2</b> | <b>2</b> | <b>2</b> | <b>2</b> | <b>2</b> | <b>1</b> | <b>1</b> |
|                                     | 250 nm       | 1        | 2        | 1        | 1        | 1        | 1        | 1        | 1        |
|                                     | 30 µM        | 1        | 1        | 1        | 1        | 1        | 1        | 1        | 1        |
|                                     | 10 nm        | 1        | 2        | 2        | 1        | 1        | 1        | 0        | 0        |
| 4 9-cis Retinoic acid               | 250 nm       | 1        | 1        | 1        | 1        | 1        | 1        | 1        | 1        |
|                                     | 30 µM        | 1        | 1        | 1        | 1        | 0        | 0        | 0        | 0        |
|                                     | 10 nm        | 1        | 1        | 2        | 2        | 1        | 1        | 1        | 1        |
| 5 13-cis Retinoic acid              | 250 nm       | 1        | 1        | 1        | 1        | 1        | 0        | 0        | 0        |
|                                     | 30 µM        | 1        | 1        | 1        | 1        | 0        | 1        | 0        | 0        |
|                                     | 10 nm        | 1        | 1        | 1        | 1        | 1        | 1        | 0        | 0        |
| 6 4-Hydroxyphenylretinamide         | 250 nm       | 0        | 1        | 1        | 1        | 1        | 1        | 0        | 0        |
|                                     | 30 µM        | 1        | 1        | 1        | 1        | 0        | 0        | 0        | 0        |
|                                     | 10 nm        | 1        | 1        | 1        | 1        | 1        | 1        | 0        | 0        |
| 7 AM-580                            | 250 nm       | 1        | 1        | 1        | 0        | 1        | 0        | 0        | 0        |
|                                     | 30 µM        | 1        | 1        | 1        | 1        | 0        | 0        | 0        | 0        |
|                                     | 10 nm        | 1        | 1        | 1        | 1        | 1        | 1        | 1        | 1        |
| <b>8 TTNPB</b>                      | <b>10 nm</b> | <b>2</b> | <b>2</b> | <b>2</b> | <b>3</b> | <b>2</b> | <b>1</b> | <b>1</b> | <b>1</b> |
|                                     | 250 nm       | 1        | 2        | 1        | 1        | 1        | 1        | 1        | 1        |
|                                     | 30 µM        | 0        | 1        | 1        | 0        | 0        | 0        | 0        | 0        |
|                                     | 10 nm        | 1        | 1        | 1        | 1        | 1        | 1        | 1        | 1        |
| 9 Methoprene acid                   | 250 nm       | 1        | 1        | 1        | 1        | 0        | 1        | 1        | 1        |
|                                     | 30 µM        | 1        | 1        | 1        | 1        | 0        | 0        | 0        | 0        |
|                                     | 10 nm        | 0        | 1        | 1        | 1        | 1        | 0        | 1        | 1        |
| 10 WY-14643                         | 250 nm       | 1        | 1        | 0        | 1        | 0        | 1        | 1        | 1        |
|                                     | 30 µM        | 1        | 1        | 1        | 1        | 1        | 1        | 1        | 1        |
|                                     | 10 nm        | 1        | 0        | 1        | 0        | 1        | 1        | 0        | 0        |
| 11 Ciglitazone                      | 250 nm       | 1        | 1        | 1        | 1        | 0        | 0        | 0        | 0        |
|                                     | 30 µM        | 0        | 1        | 1        | 0        | 0        | 0        | 0        | 0        |
|                                     | 10 nm        | 1        | 1        | 1        | 1        | 1        | 0        | 0        | 0        |
| 12 Tetradecylthioacetic acid        | 250 nm       | 1        | 1        | 1        | 1        | 0        | 1        | 0        | 0        |
|                                     | 30 µM        | 1        | 1        | 0        | 1        | 0        | 0        | 0        | 0        |
|                                     | 10 nm        | 1        | 1        | 1        | 1        | 1        | 0        | 0        | 0        |
| 13 5,8,11,14-Eicosatetraynoic acid  | 250 nm       | 1        | 1        | 1        | 1        | 1        | 0        | 0        | 0        |
|                                     | 30 µM        | 1        | 1        | 1        | 0        | 0        | 0        | 0        | 0        |
|                                     | 10 nm        | 0        | 1        | 1        | 1        | 0        | 1        | 1        | 1        |
| 14 6-Formylindolo [3,2-B] carbazole | 250 nm       | 1        | 1        | 1        | 1        | 0        | 0        | 0        | 0        |
|                                     | 30 µM        | 1        | 1        | 1        | 0        | 0        | 0        | 0        | 0        |
|                                     | 10 nm        | 1        | 1        | 1        | 1        | 1        | 0        | 0        | 0        |

|                                        |        |   |   |   |   |   |   |   |   |
|----------------------------------------|--------|---|---|---|---|---|---|---|---|
| 15 Diindolylmethane                    | 10 nm  | 1 | 1 | 1 | 0 | 0 | 0 | 0 | 0 |
|                                        | 250 nm | 1 | 1 | 0 | 0 | 0 | 0 | 0 | 0 |
|                                        | 30 µM  | 0 | 0 | 0 | 0 | 0 | 0 | 0 | 0 |
| 16 Acetyl-S-farnesyl-L-cysteine        | 10 nm  | 1 | 1 | 1 | 1 | 1 | 1 | 1 | 1 |
|                                        | 250 nm | 1 | 1 | 1 | 1 | 1 | 0 | 0 | 0 |
|                                        | 30 µM  | 1 | 1 | 0 | 0 | 0 | 1 | 0 | 0 |
| 17 S-Farnesyl-L-cysteine methyl ester  | 10 nm  | 1 | 1 | 1 | 1 | 1 | 1 | 1 | 1 |
|                                        | 250 nm | 1 | 1 | 1 | 1 | 1 | 1 | 1 | 1 |
|                                        | 30 µM  | 1 | 0 | 0 | 0 | 0 | 0 | 0 | 0 |
| 18 N-Acetyl-S-geranygeranyl-L-cysteine | 10 nm  | 1 | 1 | 1 | 1 | 1 | 1 | 1 | 1 |
|                                        | 250 nm | 1 | 1 | 1 | 1 | 1 | 1 | 1 | 1 |
|                                        | 30 µM  | 1 | 1 | 1 | 1 | 1 | 1 | 1 | 1 |
| 19 AGC (Acetyl-geranyl-cysteine)       | 10 nm  | 1 | 1 | 1 | 1 | 0 | 1 | 0 | 0 |
|                                        | 250 nm | 1 | 1 | 1 | 0 | 0 | 0 | 0 | 0 |
|                                        | 30 µM  | 0 | 1 | 1 | 1 | 0 | 0 | 0 | 0 |
| 20 Farnesylthioacetic acid             | 10 nm  | 1 | 1 | 1 | 1 | 0 | 1 | 0 | 0 |
|                                        | 250 nm | 1 | 1 | 1 | 1 | 0 | 1 | 0 | 0 |
|                                        | 30 µM  | 1 | 0 | 0 | 0 | 0 | 0 | 0 | 0 |
| 21 Bezafibrate                         | 10 nm  | 1 | 1 | 1 | 1 | 1 | 1 | 0 | 0 |
|                                        | 250 nm | 1 | 1 | 1 | 1 | 0 | 1 | 0 | 0 |
|                                        | 30 µM  | 1 | 1 | 1 | 1 | 0 | 0 | 1 | 1 |
| 22 LY 171883                           | 10 nm  | 1 | 1 | 1 | 1 | 1 | 0 | 0 | 0 |
|                                        | 250 nm | 1 | 1 | 1 | 1 | 1 | 0 | 0 | 0 |
|                                        | 30 µM  | 1 | 1 | 1 | 1 | 0 | 0 | 0 | 0 |
| 23 15-Deoxy-D12,14-prostaglandin J2    | 10 nm  | 1 | 1 | 0 | 1 | 1 | 0 | 1 | 1 |
|                                        | 250 nm | 1 | 0 | 1 | 1 | 0 | 0 | 0 | 0 |
|                                        | 30 µM  | 1 | 1 | 1 | 1 | 1 | 0 | 0 | 0 |
| 24 Troglitazone                        | 10 nm  | 1 | 1 | 1 | 1 | 1 | 1 | 1 | 1 |
|                                        | 250 nm | 1 | 1 | 1 | 1 | 0 | 0 | 0 | 0 |
|                                        | 30 µM  | 0 | 1 | 0 | 0 | 0 | 0 | 0 | 0 |
| 25 CITCO                               | 10 nm  | 1 | 1 | 1 | 1 | 1 | 1 | 1 | 1 |
|                                        | 250 nm | 1 | 1 | 1 | 0 | 0 | 0 | 0 | 0 |
|                                        | 30 µM  | 1 | 1 | 0 | 0 | 0 | 0 | 0 | 0 |
| 26 Paxilline                           | 10 nm  | 1 | 1 | 1 | 1 | 1 | 1 | 1 | 1 |
|                                        | 250 nm | 1 | 1 | 1 | 1 | 1 | 0 | 0 | 0 |
|                                        | 30 µM  | 0 | 1 | 0 | 0 | 0 | 0 | 0 | 0 |
| 27 24(S)-Hydroxycholesterol            | 10 nm  | 1 | 1 | 0 | 1 | 0 | 1 | 0 | 0 |
|                                        | 250 nm | 1 | 1 | 1 | 1 | 0 | 0 | 0 | 0 |
|                                        | 30 µM  | 0 | 1 | 0 | 0 | 0 | 0 | 0 | 0 |
| 28 24(S),25-Epoxycholesterol           | 10 nm  | 0 | 1 | 1 | 0 | 0 | 0 | 1 | 1 |
|                                        | 250 nm | 1 | 1 | 1 | 0 | 0 | 0 | 0 | 0 |
|                                        | 30 µM  | 1 | 1 | 0 | 0 | 0 | 0 | 0 | 0 |
| 29 Pregnenolone-16(alpha)-carbonitrile | 10 nm  | 1 | 1 | 1 | 0 | 1 | 0 | 0 | 0 |
|                                        | 250 nm | 1 | 1 | 1 | 0 | 0 | 0 | 0 | 0 |

|                                              |        |   |   |   |   |   |   |   |   |
|----------------------------------------------|--------|---|---|---|---|---|---|---|---|
|                                              | 30 µM  | 1 | 1 | 0 | 0 | 0 | 0 | 0 | 0 |
| 30 Carbacyclin                               | 10 nm  | 1 | 2 | 2 | 2 | 2 | 1 | 1 | 1 |
|                                              | 250 nm | 4 | 8 | 9 | 9 | 8 | 6 | 5 | 5 |
|                                              | 30 µM  | 1 | 1 | 1 | 1 | 1 | 1 | 1 | 1 |
| 31 Clofibrilic acid                          | 10 nm  | 0 | 1 | 1 | 1 | 0 | 1 | 0 | 0 |
|                                              | 250 nm | 1 | 1 | 1 | 1 | 1 | 0 | 0 | 0 |
|                                              | 30 µM  | 0 | 1 | 1 | 1 | 0 | 1 | 0 | 0 |
| 32 BADGE                                     | 10 nm  | 1 | 1 | 0 | 1 | 1 | 0 | 0 | 0 |
|                                              | 250 nm | 1 | 1 | 1 | 1 | 0 | 1 | 0 | 0 |
|                                              | 30 µM  | 1 | 1 | 0 | 1 | 0 | 0 | 0 | 0 |
| 33 GW 9662                                   | 10 nm  | 1 | 1 | 2 | 1 | 1 | 1 | 1 | 1 |
|                                              | 250 nm | 1 | 1 | 0 | 0 | 0 | 0 | 0 | 0 |
|                                              | 30 µM  | 1 | 0 | 0 | 0 | 0 | 0 | 0 | 0 |
| 34 Gemfibrozil                               | 10 nm  | 0 | 1 | 1 | 1 | 1 | 0 | 1 | 1 |
|                                              | 250 nm | 1 | 1 | 1 | 1 | 1 | 0 | 0 | 0 |
|                                              | 30 µM  | 1 | 0 | 0 | 0 | 0 | 1 | 0 | 0 |
| 35 GW 7647                                   | 10 nm  | 1 | 1 | 1 | 1 | 1 | 1 | 1 | 1 |
|                                              | 250 nm | 1 | 1 | 2 | 1 | 1 | 1 | 1 | 1 |
|                                              | 30 µM  | 1 | 1 | 1 | 1 | 0 | 0 | 0 | 0 |
| 36 3,5-Diiodo-L-thyronine                    | 10 nm  | 1 | 1 | 1 | 1 | 0 | 1 | 0 | 0 |
|                                              | 250 nm | 1 | 1 | 1 | 1 | 1 | 0 | 0 | 0 |
|                                              | 30 µM  | 1 | 1 | 1 | 0 | 0 | 0 | 0 | 0 |
| 37 3,5-Diiodo-L-tyrosine                     | 10 nm  | 0 | 1 | 1 | 1 | 1 | 1 | 0 | 0 |
|                                              | 250 nm | 1 | 1 | 1 | 1 | 0 | 0 | 1 | 1 |
|                                              | 30 µM  | 1 | 1 | 1 | 0 | 0 | 0 | 0 | 0 |
| 38 all-trans-Retinol                         | 10 nm  | 1 | 1 | 1 | 1 | 0 | 1 | 1 | 1 |
|                                              | 250 nm | 1 | 1 | 1 | 1 | 1 | 1 | 1 | 1 |
|                                              | 30 µM  | 1 | 1 | 0 | 0 | 0 | 0 | 0 | 0 |
| 39 13-cis-Retinol                            | 10 nm  | 1 | 1 | 1 | 1 | 1 | 1 | 1 | 1 |
|                                              | 250 nm | 1 | 1 | 1 | 1 | 0 | 0 | 0 | 0 |
|                                              | 30 µM  | 1 | 1 | 0 | 0 | 0 | 0 | 0 | 0 |
| 40 Retinyl acetate                           | 10 nm  | 1 | 1 | 1 | 1 | 1 | 1 | 1 | 1 |
|                                              | 250 nm | 1 | 2 | 2 | 1 | 1 | 0 | 0 | 0 |
|                                              | 30 µM  | 1 | 0 | 0 | 0 | 0 | 0 | 0 | 0 |
| 41 3,5-Diiodo-4-hydroxy-phenylpropionic acid | 10 nm  | 1 | 1 | 1 | 1 | 1 | 1 | 0 | 0 |
|                                              | 250 nm | 1 | 1 | 1 | 1 | 0 | 0 | 0 | 0 |
|                                              | 30 µM  | 1 | 1 | 0 | 0 | 0 | 0 | 0 | 0 |
| 42 Cholic acid                               | 10 nm  | 1 | 1 | 1 | 1 | 0 | 1 | 0 | 0 |
|                                              | 250 nm | 1 | 1 | 1 | 1 | 0 | 0 | 0 | 0 |
|                                              | 30 µM  | 1 | 1 | 0 | 0 | 0 | 0 | 0 | 0 |
| 43 Deoxycholic acid                          | 10 nm  | 0 | 1 | 1 | 1 | 1 | 1 | 1 | 1 |
|                                              | 250 nm | 1 | 1 | 1 | 1 | 1 | 0 | 1 | 1 |
|                                              | 30 µM  | 1 | 0 | 1 | 1 | 0 | 0 | 0 | 0 |
| 44 Chenodeoxycholic acid                     | 10 nm  | 1 | 1 | 1 | 1 | 0 | 0 | 0 | 0 |

|                          |        |   |   |   |   |   |   |   |   |
|--------------------------|--------|---|---|---|---|---|---|---|---|
|                          | 250 nm | 0 | 0 | 0 | 0 | 0 | 0 | 0 | 0 |
|                          | 30 µM  | 0 | 0 | 0 | 0 | 0 | 0 | 0 | 0 |
| 45 Glycocholic acid      | 10 nm  | 1 | 1 | 1 | 0 | 0 | 0 | 1 | 1 |
|                          | 250 nm | 1 | 0 | 0 | 0 | 0 | 0 | 0 | 0 |
|                          | 30 µM  | 0 | 0 | 0 | 0 | 0 | 0 | 0 | 0 |
| 46 Glycodeoxycholic acid | 10 nm  | 1 | 0 | 0 | 0 | 0 | 0 | 0 | 0 |
|                          | 250 nm | 0 | 0 | 0 | 0 | 0 | 0 | 0 | 0 |
|                          | 30 µM  | 1 | 1 | 1 | 1 | 1 | 1 | 1 | 1 |
| 47 Taurocholic acid      | 10 nm  | 1 | 1 | 1 | 1 | 0 | 0 | 0 | 0 |
|                          | 250 nm | 1 | 0 | 0 | 0 | 0 | 0 | 0 | 0 |
|                          | 30 µM  | 0 | 0 | 0 | 0 | 0 | 0 | 0 | 0 |
| 48 Taurodeoxycholic acid | 10 nm  | 1 | 1 | 1 | 1 | 1 | 0 | 0 | 0 |
|                          | 250 nm | 1 | 1 | 1 | 1 | 0 | 0 | 0 | 0 |
|                          | 30 µM  | 1 | 1 | 0 | 0 | 0 | 0 | 0 | 0 |
| 49 Rifampicin            | 10 nm  | 1 | 1 | 1 | 1 | 1 | 1 | 0 | 0 |
|                          | 250 nm | 1 | 1 | 1 | 1 | 1 | 1 | 0 | 0 |
|                          | 30 µM  | 1 | 1 | 1 | 1 | 1 | 0 | 0 | 0 |
| 50 Dexamethasone         | 10 nm  | 1 | 1 | 0 | 0 | 0 | 0 | 0 | 0 |
|                          | 250 nm | 0 | 0 | 0 | 0 | 0 | 0 | 0 | 0 |
|                          | 30 µM  | 0 | 0 | 0 | 0 | 0 | 0 | 0 | 0 |
| 51 Lithocholic acid      | 10 nm  | 1 | 1 | 1 | 0 | 1 | 1 | 0 | 0 |
|                          | 250 nm | 1 | 1 | 1 | 1 | 1 | 0 | 0 | 0 |
|                          | 30 µM  | 1 | 1 | 0 | 0 | 0 | 0 | 0 | 0 |
| 52 5b-Pregnan-3,20-dione | 10 nm  | 1 | 1 | 1 | 1 | 1 | 0 | 1 | 1 |
|                          | 250 nm | 1 | 1 | 2 | 1 | 1 | 0 | 0 | 0 |
|                          | 30 µM  | 1 | 0 | 0 | 0 | 0 | 0 | 0 | 0 |
| 53 Hyperforin            | 10 nm  | 1 | 1 | 1 | 1 | 1 | 0 | 0 | 0 |
|                          | 250 nm | 1 | 1 | 1 | 0 | 0 | 0 | 0 | 0 |
|                          | 30 µM  | 1 | 0 | 0 | 0 | 0 | 0 | 0 | 0 |
| 54 Farnesol              | 10 nm  | 1 | 1 | 1 | 1 | 1 | 1 | 0 | 0 |
|                          | 250 nm | 1 | 1 | 2 | 1 | 1 | 0 | 1 | 1 |
|                          | 30 µM  | 1 | 1 | 1 | 0 | 0 | 0 | 0 | 0 |
| 55 3a, 5a-Androstenol    | 10 nm  | 1 | 1 | 1 | 1 | 0 | 1 | 1 | 1 |
|                          | 250 nm | 1 | 1 | 1 | 1 | 0 | 0 | 0 | 0 |
|                          | 30 µM  | 1 | 1 | 0 | 0 | 0 | 0 | 0 | 0 |
| 56 TCPOBOP               | 10 nm  | 1 | 1 | 1 | 1 | 1 | 0 | 0 | 0 |
|                          | 250 nm | 1 | 1 | 1 | 1 | 0 | 0 | 0 | 0 |
|                          | 30 µM  | 1 | 0 | 0 | 0 | 0 | 0 | 0 | 0 |
| 57 N-Oleoylethanolamide  | 10 nm  | 1 | 1 | 1 | 1 | 1 | 1 | 0 | 0 |
|                          | 250 nm | 1 | 1 | 1 | 1 | 0 | 0 | 0 | 0 |
|                          | 30 µM  | 1 | 0 | 0 | 0 | 0 | 0 | 0 | 0 |
| 58 GW4064                | 10 nm  | 1 | 1 | 1 | 1 | 1 | 0 | 0 | 0 |
|                          | 250 nm | 1 | 1 | 1 | 1 | 1 | 0 | 0 | 0 |
|                          | 30 µM  | 1 | 1 | 1 | 0 | 0 | 0 | 0 | 0 |

|                                                    |        |   |   |   |   |   |   |   |   |
|----------------------------------------------------|--------|---|---|---|---|---|---|---|---|
| 59 Geranylgeraniol                                 | 10 nm  | 1 | 1 | 1 | 1 | 1 | 1 | 0 | 0 |
|                                                    | 250 nm | 1 | 1 | 1 | 1 | 1 | 0 | 0 | 0 |
|                                                    | 30 µM  | 1 | 0 | 0 | 0 | 0 | 0 | 0 | 0 |
| 60 6a-Fluorotestosterone                           | 10 nm  | 1 | 1 | 1 | 1 | 1 | 0 | 0 | 0 |
|                                                    | 250 nm | 1 | 1 | 1 | 0 | 0 | 0 | 0 | 0 |
|                                                    | 30 µM  | 1 | 0 | 0 | 0 | 0 | 0 | 0 | 0 |
| 61 Tamoxifen                                       | 10 nm  | 1 | 1 | 1 | 1 | 1 | 1 | 0 | 0 |
|                                                    | 250 nm | 1 | 1 | 1 | 1 | 1 | 0 | 0 | 0 |
|                                                    | 30 µM  | 0 | 0 | 0 | 0 | 0 | 0 | 0 | 0 |
| 62 Mifepristone                                    | 10 nm  | 1 | 1 | 1 | 1 | 0 | 0 | 0 | 0 |
|                                                    | 250 nm | 1 | 1 | 1 | 0 | 0 | 0 | 0 | 0 |
|                                                    | 30 µM  | 0 | 0 | 0 | 0 | 0 | 0 | 0 | 0 |
| 63 Estrone                                         | 10 nm  | 1 | 1 | 1 | 1 | 1 | 1 | 0 | 0 |
|                                                    | 250 nm | 1 | 1 | 1 | 0 | 0 | 0 | 0 | 0 |
|                                                    | 30 µM  | 0 | 0 | 0 | 0 | 0 | 0 | 0 | 0 |
| 64 13(S)-Hydroxy-9Z,<br>11E-octadecadienoic acid   | 10 nm  | 1 | 1 | 1 | 1 | 1 | 0 | 0 | 0 |
|                                                    | 250 nm | 1 | 1 | 1 | 0 | 0 | 0 | 0 | 0 |
|                                                    | 30 µM  | 0 | 0 | 0 | 0 | 0 | 0 | 0 | 0 |
| 65 Cortisone                                       | 10 nm  | 1 | 1 | 1 | 1 | 1 | 0 | 0 | 0 |
|                                                    | 250 nm | 1 | 0 | 1 | 0 | 0 | 0 | 0 | 0 |
|                                                    | 30 µM  | 0 | 0 | 0 | 0 | 0 | 0 | 0 | 0 |
| 66 Progesterone                                    | 10 nm  | 1 | 1 | 1 | 1 | 1 | 0 | 0 | 0 |
|                                                    | 250 nm | 1 | 1 | 1 | 0 | 0 | 0 | 0 | 0 |
|                                                    | 30 µM  | 1 | 1 | 0 | 0 | 0 | 0 | 0 | 0 |
| 67 17b-Estradiol                                   | 10 nm  | 1 | 1 | 1 | 1 | 1 | 1 | 0 | 0 |
|                                                    | 250 nm | 0 | 1 | 1 | 1 | 1 | 0 | 0 | 0 |
|                                                    | 30 µM  | 1 | 0 | 0 | 0 | 0 | 0 | 0 | 0 |
| 68 Pregnenolone                                    | 10 nm  | 0 | 1 | 1 | 1 | 1 | 0 | 0 | 0 |
|                                                    | 250 nm | 1 | 1 | 1 | 1 | 0 | 0 | 0 | 0 |
|                                                    | 30 µM  | 1 | 0 | 0 | 0 | 0 | 0 | 0 | 0 |
| 69 Androstenedione                                 | 10 nm  | 1 | 1 | 1 | 1 | 1 | 0 | 0 | 0 |
|                                                    | 250 nm | 1 | 1 | 1 | 1 | 0 | 0 | 0 | 0 |
|                                                    | 30 µM  | 1 | 0 | 0 | 0 | 0 | 0 | 0 | 0 |
| 70 1a,25-Dihydroxyvitamin D3                       | 10 nm  | 0 | 1 | 1 | 1 | 1 | 1 | 1 | 0 |
|                                                    | 250 nm | 1 | 1 | 1 | 1 | 0 | 0 | 0 | 0 |
|                                                    | 30 µM  | 1 | 0 | 0 | 0 | 0 | 0 | 0 | 0 |
| 71 Docosa-4Z,7Z,10Z,13Z,<br>16Z,19Z-hexaenoic acid | 10 nm  | 1 | 1 | 1 | 1 | 1 | 0 | 0 | 1 |
|                                                    | 250 nm | 1 | 1 | 1 | 1 | 0 | 0 | 0 | 0 |
|                                                    | 30 µM  | 1 | 0 | 0 | 0 | 0 | 0 | 0 | 0 |
| 72 3-Methylcholanthrene                            | 10 nm  | 1 | 1 | 1 | 1 | 1 | 1 | 1 | 0 |
|                                                    | 250 nm | 1 | 1 | 1 | 1 | 0 | 0 | 0 | 0 |
|                                                    | 30 µM  | 0 | 0 | 0 | 0 | 0 | 0 | 0 | 0 |
| 73 Acitretin                                       | 10 nm  | 1 | 1 | 1 | 1 | 1 | 0 | 0 | 1 |
|                                                    | 250 nm | 1 | 1 | 1 | 1 | 0 | 0 | 0 | 0 |

|                                  |              |          |          |          |          |          |          |          |          |
|----------------------------------|--------------|----------|----------|----------|----------|----------|----------|----------|----------|
|                                  | 30 $\mu$ M   | 1        | 0        | 0        | 0        | 0        | 0        | 0        | 0        |
| 74 Pioglitazone                  | 10 nm        | 1        | 1        | 1        | 1        | 1        | 0        | 0        | 0        |
|                                  | 250 nm       | 1        | 1        | 1        | 1        | 1        | 0        | 0        | 0        |
|                                  | 30 $\mu$ M   | 1        | 0        | 0        | 0        | 0        | 0        | 0        | 0        |
| 75 <b>4-Hydroxyretinoic acid</b> | <b>10 nm</b> | <b>2</b> | <b>3</b> | <b>3</b> | <b>2</b> | <b>2</b> | <b>1</b> | <b>0</b> | <b>0</b> |
|                                  | 250 nm       | 1        | 1        | 1        | 1        | 1        | 1        | 1        | 0        |
|                                  | 30 $\mu$ M   | 1        | 1        | 1        | 0        | 0        | 0        | 0        | 0        |
| 76 3-amino benzamide             | 10 nm        | 1        | 1        | 0        | 1        | 1        | 1        | 1        | 0        |
|                                  | 250 nm       | 1        | 0        | 0        | 1        | 1        | 1        | 1        | 1        |
|                                  | 30 $\mu$ M   | 1        | 0        | 1        | 0        | 0        | 0        | 0        | 0        |
| 77 Phthalazinone pyrazole        | 10 nm        | 1        | 1        | 1        | 1        | 1        | 1        | 1        | 1        |
|                                  | 250 nm       | 1        | 0        | 1        | 0        | 0        | 0        | 0        | 1        |
|                                  | 30 $\mu$ M   | 1        | 1        | 1        | 1        | 0        | 0        | 0        | 0        |
| 78 AGK2                          | 10 nm        | 1        | 1        | 1        | 0        | 1        | 1        | 0        | 1        |
|                                  | 250 nm       | 1        | 1        | 1        | 1        | 1        | 1        | 1        | 0        |
|                                  | 30 $\mu$ M   | 1        | 1        | 1        | 0        | 0        | 0        | 0        | 0        |
| 79 Mirin                         | 10 nm        | 1        | 1        | 1        | 1        | 1        | 0        | 0        | 0        |
|                                  | 250 nm       | 1        | 1        | 1        | 1        | 0        | 0        | 1        | 1        |
|                                  | 30 $\mu$ M   | 1        | 1        | 1        | 1        | 1        | 0        | 0        | 0        |
| 80 chidamide                     | 10 nm        | 1        | 1        | 1        | 1        | 1        | 1        | 0        | 0        |
|                                  | 250 nm       | 1        | 1        | 1        | 1        | 1        | 1        | 1        | 1        |
|                                  | 30 $\mu$ M   | 1        | 1        | 1        | 1        | 0        | 0        | 0        | 0        |
| 81 SAHA                          | 10 nm        | 1        | 1        | 1        | 1        | 1        | 1        | 1        | 0        |
|                                  | 250 nm       | 1        | 1        | 1        | 1        | 0        | 0        | 1        | 1        |
|                                  | 30 $\mu$ M   | 1        | 1        | 0        | 1        | 0        | 0        | 0        | 0        |
| 82 F-Amidine                     | 10 nm        | 1        | 1        | 1        | 1        | 1        | 0        | 1        | 1        |
|                                  | 250 nm       | 1        | 1        | 1        | 1        | 0        | 1        | 0        | 1        |
|                                  | 30 $\mu$ M   | 1        | 1        | 0        | 0        | 0        | 0        | 0        | 0        |
| 83 4-iodo-SAHA                   | 10 nm        | 1        | 1        | 1        | 1        | 1        | 0        | 1        | 1        |
|                                  | 250 nm       | 1        | 1        | 1        | 1        | 1        | 0        | 0        | 0        |
|                                  | 30 $\mu$ M   | 1        | 1        | 0        | 0        | 0        | 0        | 0        | 0        |
| 84 UNC0321                       | 10 nm        | 1        | 1        | 1        | 1        | 0        | 0        | 0        | 1        |
|                                  | 250 nm       | 1        | 1        | 0        | 0        | 1        | 0        | 0        | 0        |
|                                  | 30 $\mu$ M   | 1        | 0        | 0        | 0        | 0        | 0        | 0        | 0        |
| 85 Isoliquiritigenin             | 10 nm        | 1        | 1        | 1        | 1        | 0        | 1        | 1        | 0        |
|                                  | 250 nm       | 1        | 1        | 1        | 1        | 1        | 0        | 0        | 0        |
|                                  | 30 $\mu$ M   | 1        | 0        | 0        | 0        | 0        | 0        | 0        | 0        |
| 86 CAY10603                      | 10 nm        | 1        | 0        | 1        | 1        | 0        | 0        | 1        | 1        |
|                                  | 250 nm       | 1        | 1        | 1        | 0        | 0        | 0        | 0        | 0        |
|                                  | 30 $\mu$ M   | 1        | 1        | 1        | 0        | 0        | 0        | 0        | 0        |
| 87 Pimelic diphenylamide 106     | 10 nm        | 1        | 1        | 1        | 1        | 0        | 1        | 0        | 1        |
|                                  | 250 nm       | 1        | 1        | 1        | 1        | 1        | 0        | 0        | 0        |
|                                  | 30 $\mu$ M   | 1        | 1        | 1        | 0        | 0        | 0        | 0        | 0        |
| 88 3-deazaneplanocin-A           | 10 nm        | 1        | 1        | 1        | 1        | 1        | 0        | 1        | 0        |

|                                         |               |          |          |          |          |          |          |          |          |
|-----------------------------------------|---------------|----------|----------|----------|----------|----------|----------|----------|----------|
|                                         | 250 nm        | 1        | 1        | 1        | 1        | 0        | 0        | 0        | 0        |
|                                         | 30 µM         | 1        | 1        | 0        | 0        | 0        | 0        | 0        | 0        |
| 89 2,4-OPD                              | 10 nm         | 1        | 1        | 1        | 1        | 1        | 0        | 0        | 1        |
|                                         | 250 nm        | 1        | 1        | 1        | 1        | 1        | 1        | 1        | 0        |
|                                         | 30 µM         | 1        | 0        | 1        | 1        | 0        | 0        | 0        | 0        |
| 90 2-PCPA (hydrochloride)               | 10 nm         | 1        | 1        | 1        | 1        | 1        | 1        | 1        | 0        |
|                                         | 250 nm        | 1        | 1        | 1        | 1        | 0        | 1        | 0        | 1        |
|                                         | 30 µM         | 1        | 1        | 0        | 0        | 0        | 0        | 0        | 0        |
| 91 Tubastatin A (trifluoroacetate salt) | 10 nm         | 1        | 1        | 1        | 1        | 1        | 0        | 0        | 1        |
|                                         | 250 nm        | 1        | 1        | 0        | 0        | 0        | 0        | 0        | 0        |
|                                         | 30 µM         | 1        | 0        | 1        | 0        | 0        | 0        | 0        | 0        |
| 92 <b>Nicotinamide</b>                  | 10 nm         | 1        | 1        | 1        | 1        | 1        | 1        | 1        | 0        |
|                                         | <b>250 nm</b> | <b>1</b> | <b>2</b> | <b>2</b> | <b>2</b> | <b>2</b> | <b>2</b> | <b>1</b> | <b>0</b> |
|                                         | 30 µM         | 1        | 1        | 1        | 0        | 1        | 0        | 0        | 0        |
| 93 Zebularine                           | 10 nm         | 1        | 1        | 1        | 1        | 0        | 1        | 0        | 1        |
|                                         | 250 nm        | 1        | 1        | 1        | 1        | 0        | 1        | 1        | 1        |
|                                         | 30 µM         | 1        | 1        | 0        | 0        | 0        | 0        | 0        | 0        |
| 94 (S)-HDAC-42                          | 10 nm         | 1        | 1        | 1        | 1        | 1        | 1        | 1        | 0        |
|                                         | 250 nm        | 1        | 1        | 1        | 1        | 1        | 1        | 1        | 1        |
|                                         | 30 µM         | 1        | 1        | 1        | 1        | 1        | 1        | 1        | 0        |
| 95 Trans-resveratrol                    | 10 nm         | 1        | 1        | 1        | 1        | 1        | 0        | 0        | 1        |
|                                         | 250 nm        | 1        | 1        | 1        | 1        | 1        | 0        | 1        | 1        |
|                                         | 30 µM         | 1        | 1        | 1        | 0        | 0        | 0        | 0        | 1        |
| 96 DMOG                                 | 10 nm         | 1        | 1        | 1        | 1        | 0        | 1        | 1        | 0        |
|                                         | 250 nm        | 1        | 1        | 1        | 1        | 1        | 1        | 0        | 1        |
|                                         | 30 µM         | 1        | 1        | 1        | 1        | 1        | 0        | 1        | 0        |
| 97 Cl-Amidine                           | 10 nm         | 1        | 1        | 1        | 1        | 1        | 1        | 0        | 1        |
|                                         | 250 nm        | 1        | 1        | 1        | 1        | 0        | 0        | 1        | 0        |
|                                         | 30 µM         | 1        | 1        | 1        | 0        | 0        | 0        | 0        | 1        |
| 98 Garcinol                             | 10 nm         | 1        | 1        | 1        | 1        | 0        | 1        | 0        | 0        |
|                                         | 250 nm        | 1        | 1        | 1        | 1        | 1        | 1        | 1        | 1        |
|                                         | 30 µM         | 1        | 1        | 1        | 0        | 0        | 0        | 0        | 0        |
| 99 BIX01284 (hydrochloride hydrate)     | 10 nm         | 1        | 1        | 1        | 1        | 1        | 1        | 0        | 0        |
|                                         | 250 nm        | 1        | 1        | 1        | 1        | 1        | 0        | 0        | 1        |
|                                         | 30 µM         | 1        | 1        | 1        | 1        | 0        | 0        | 0        | 0        |
| 100 Valproic acid ( sodium salt)        | 10 nm         | 1        | 1        | 1        | 1        | 1        | 0        | 1        | 0        |
|                                         | 250 nm        | 1        | 1        | 1        | 1        | 1        | 1        | 1        | 0        |
|                                         | 30 µM         | 1        | 1        | 1        | 1        | 1        | 0        | 1        | 0        |
| 101 splitomicin                         | 10 nm         | 1        | 1        | 1        | 1        | 1        | 0        | 1        | 1        |
|                                         | 250 nm        | 1        | 1        | 1        | 1        | 1        | 1        | 0        | 1        |
|                                         | 30 µM         | 1        | 1        | 1        | 1        | 0        | 1        | 0        | 1        |
| 102 MS-275                              | 10 nm         | 1        | 1        | 1        | 1        | 1        | 1        | 0        | 1        |
|                                         | 250 nm        | 1        | 1        | 1        | 1        | 0        | 0        | 1        | 0        |
|                                         | 30 µM         | 1        | 1        | 1        | 0        | 1        | 0        | 0        | 0        |

|                           |               |          |          |          |          |          |          |          |          |
|---------------------------|---------------|----------|----------|----------|----------|----------|----------|----------|----------|
| 103 trichostatin A        | 10 nm         | 0        | 1        | 1        | 1        | 1        | 1        | 1        | 0        |
|                           | 250 nm        | 1        | 1        | 1        | 1        | 0        | 0        | 0        | 1        |
|                           | 30 µM         | 1        | 0        | 1        | 0        | 0        | 0        | 0        | 0        |
| 104 Ellagic acid          | 10 nm         | 1        | 1        | 1        | 1        | 0        | 1        | 0        | 1        |
|                           | 250 nm        | 1        | 1        | 1        | 1        | 0        | 0        | 0        | 0        |
|                           | 30 µM         | 1        | 1        | 1        | 1        | 1        | 0        | 0        | 0        |
| 105 Suramin (sodium salt) | 10 nm         | 1        | 1        | 1        | 0        | 1        | 1        | 1        | 0        |
|                           | 250 nm        | 1        | 1        | 1        | 1        | 1        | 0        | 0        | 0        |
|                           | 30 µM         | 1        | 1        | 1        | 1        | 0        | 0        | 0        | 0        |
| 106 Tenovin-1             | 10 nm         | 1        | 1        | 1        | 1        | 1        | 0        | 0        | 1        |
|                           | 250 nm        | 1        | 1        | 1        | 1        | 0        | 1        | 0        | 0        |
|                           | 30 µM         | 1        | 1        | 1        | 0        | 0        | 0        | 0        | 0        |
| 107 CBHA                  | 10 nm         | 1        | 1        | 1        | 1        | 1        | 0        | 1        | 0        |
|                           | 250 nm        | 1        | 1        | 1        | 1        | 1        | 0        | 0        | 0        |
|                           | 30 µM         | 1        | 1        | 1        | 1        | 0        | 0        | 0        | 0        |
| 108 HNHA                  | 10 nm         | 1        | 1        | 1        | 1        | 1        | 1        | 1        | 1        |
|                           | 250 nm        | 1        | 1        | 1        | 1        | 1        | 1        | 1        | 0        |
|                           | 30 µM         | 1        | 1        | 1        | 1        | 1        | 1        | 1        | 0        |
| 109 (-)- Neplanocin A     | 10 nm         | 1        | 1        | 1        | 1        | 1        | 0        | 1        | 1        |
|                           | 250 nm        | 1        | 1        | 1        | 1        | 1        | 0        | 0        | 1        |
|                           | 30 µM         | 1        | 1        | 1        | 1        | 0        | 0        | 0        | 1        |
| 110 Sciptaid              | 10 nm         | 1        | 1        | 1        | 1        | 1        | 1        | 0        | 1        |
|                           | 250 nm        | 1        | 1        | 1        | 1        | 0        | 0        | 1        | 0        |
|                           | 30 µM         | 1        | 1        | 1        | 1        | 0        | 0        | 0        | 0        |
| 111 JGB1741               | 10 nm         | 1        | 1        | 1        | 1        | 0        | 1        | 1        | 0        |
|                           | 250 nm        | 1        | 1        | 1        | 1        | 1        | 0        | 0        | 1        |
|                           | 30 µM         | 1        | 1        | 1        | 1        | 1        | 1        | 0        | 0        |
| 112 Tinovin-6             | 10 nm         | 0        | 1        | 1        | 1        | 1        | 1        | 1        | 1        |
|                           | 250 nm        | 1        | 1        | 1        | 1        | 1        | 1        | 1        | 0        |
|                           | 30 µM         | 1        | 1        | 1        | 1        | 0        | 0        | 0        | 0        |
| 113 M-344                 | 10 nm         | 1        | 1        | 1        | 1        | 0        | 1        | 0        | 1        |
|                           | 250 nm        | 1        | 1        | 1        | 1        | 0        | 1        | 0        | 1        |
|                           | 30 µM         | 1        | 1        | 1        | 0        | 0        | 0        | 0        | 0        |
| <b>114 RG-108</b>         | 10 nm         | 1        | 1        | 1        | 1        | 1        | 1        | 0        | 0        |
|                           | <b>250 nm</b> | <b>1</b> | <b>2</b> | <b>2</b> | <b>3</b> | <b>3</b> | <b>2</b> | <b>1</b> | <b>0</b> |
|                           | 30 µM         | 1        | 1        | 1        | 1        | 1        | 1        | 1        | 0        |
| <b>115 CAY10433</b>       | 10 nm         | 1        | 1        | 2        | 1        | 1        | 1        | 1        | 0        |
|                           | <b>250 nm</b> | <b>2</b> | <b>2</b> | <b>3</b> | <b>3</b> | <b>3</b> | <b>2</b> | <b>1</b> | <b>1</b> |
|                           | 30 µM         | 1        | 1        | 1        | 1        | 1        | 1        | 0        | 1        |
| <b>116 Sinefungin</b>     | 10 nm         | 1        | 1        | 1        | 1        | 1        | 0        | 1        | 1        |
|                           | <b>250 nm</b> | <b>1</b> | <b>2</b> | <b>2</b> | <b>2</b> | <b>2</b> | <b>1</b> | <b>1</b> | <b>1</b> |
|                           | 30 µM         | 1        | 1        | 1        | 1        | 0        | 1        | 0        | 0        |
| 117 Suberohydroxamic acid | 10 nm         | 1        | 1        | 1        | 1        | 1        | 0        | 1        | 1        |
|                           | 250 nm        | 1        | 1        | 1        | 1        | 0        | 0        | 0        | 1        |



|                                     |        |          |          |          |           |           |          |          |          |
|-------------------------------------|--------|----------|----------|----------|-----------|-----------|----------|----------|----------|
|                                     | 30 µM  | 1        | 0        | 0        | 0         | 0         | 0        | 0        | 0        |
| 118 I-BET                           | 10 nm  | 1        | 1        | 1        | 1         | 1         | 1        | 0        | 1        |
|                                     | 250 nm | 0        | 1        | 1        | 1         | 1         | 0        | 0        | 0        |
|                                     | 30 µM  | 1        | 1        | 1        | 1         | 0         | 0        | 0        | 0        |
| 119 Sodium butyrate                 | 10 nm  | 1        | 1        | 1        | 1         | 1         | 0        | 0        | 0        |
|                                     | 250 nm | 1        | 1        | 1        | 1         | 0         | 0        | 0        | 0        |
|                                     | 30 µM  | 1        | 1        | 1        | 0         | 0         | 0        | 0        | 0        |
| 120 Oxamflatin                      | 10 nm  | 1        | 1        | 1        | 1         | 1         | 0        | 0        | 0        |
|                                     | 250 nm | 1        | 0        | 0        | 0         | 0         | 0        | 0        | 0        |
|                                     | 30 µM  | 0        | 0        | 0        | 0         | 0         | 0        | 0        | 0        |
| 121 2,3,5-triacetylyl-5-azacytidine | 10 nm  | 1        | 1        | 1        | 1         | 0         | 1        | 0        | 0        |
|                                     | 250 nm | 1        | 1        | 1        | 1         | 1         | 0        | 0        | 0        |
|                                     | 30 µM  | 1        | 1        | 1        | 0         | 0         | 0        | 0        | 0        |
| 122 piceatannol                     | 10 nm  | 1        | 1        | 1        | 1         | 1         | 1        | 0        | 0        |
|                                     | 250 nm | 1        | 1        | 1        | 1         | 1         | 0        | 0        | 0        |
|                                     | 30 µM  | 1        | 1        | 1        | 0         | 0         | 0        | 0        | 0        |
| 123 S-adenosylhomocysteine          | 10 nm  | 1        | 1        | 1        | 1         | 1         | 0        | 0        | 0        |
|                                     | 250 nm | 1        | 1        | 1        | 1         | 0         | 0        | 0        | 0        |
|                                     | 30 µM  | 1        | 1        | 1        | 0         | 0         | 0        | 0        | 0        |
| 124 UNC0638                         | 10 nm  | 1        | 1        | 1        | 1         | 1         | 0        | 1        | 0        |
|                                     | 250 nm | 0        | 1        | 1        | 1         | 0         | 1        | 0        | 0        |
|                                     | 30 µM  | 1        | 1        | 1        | 1         | 0         | 0        | 0        | 0        |
| 125 Anacardic acid                  | 10 nm  | 1        | 1        | 1        | 1         | 0         | 1        | 0        | 1        |
|                                     | 250 nm | 0        | 1        | 1        | 1         | 1         | 0        | 0        | 0        |
|                                     | 30 µM  | 1        | 1        | 1        | 0         | 0         | 0        | 0        | 0        |
| 126 Salermide                       | 10 nm  | 1        | 1        | 1        | 1         | 1         | 0        | 1        | 0        |
|                                     | 250 nm | 1        | 1        | 0        | 1         | 0         | 1        | 0        | 0        |
|                                     | 30 µM  | 0        | 1        | 1        | 0         | 0         | 0        | 0        | 0        |
| 127 UNC0224                         | 10 nm  | 1        | 1        | 1        | 0         | 0         | 1        | 0        | 1        |
|                                     | 250 nm | 1        | 1        | 1        | 0         | 0         | 0        | 0        | 0        |
|                                     | 30 µM  | 1        | 1        | 0        | 0         | 0         | 1        | 0        | 0        |
| 128 EX-527                          | 10 nm  | 1        | 1        | 1        | 1         | 1         | 1        | 1        | 0        |
|                                     | 250 nm | 1        | 1        | 1        | 1         | 0         | 1        | 1        | 0        |
|                                     | 30 µM  | 1        | 1        | 0        | 1         | 1         | 1        | 1        | 0        |
| 129 CCG-100402                      | 10 nm  | 1        | 1        | 1        | 1         | 1         | 0        | 0        | 1        |
|                                     | 250 nm | 1        | 1        | 1        | 1         | 0         | 0        | 1        | 1        |
|                                     | 30 µM  | 1        | 1        | 1        | 0         | 0         | 0        | 0        | 1        |
| <b>130 10% FCS</b>                  |        | <b>2</b> | <b>3</b> | <b>4</b> | <b>5</b>  | <b>6</b>  | <b>6</b> | <b>4</b> | <b>2</b> |
| <b>131 FGF1+ p38 inhibitor</b>      |        | <b>3</b> | <b>8</b> | <b>9</b> | <b>10</b> | <b>10</b> | <b>9</b> | <b>7</b> | <b>3</b> |

orange  
red

controls  
positive hits
