# Supplementary material for: Live cell screening platform identifies PPARδ as a regulator of cardiomyocyte proliferation and cardiac repair
Source: PubMed Central journal article supplement (PMC5539351; doi:10.1038/cr.2017.84), 2017-06-16
Supplement: cr201784x13.pdf [file cr201784x13.pdf]

**Magadum et al. Table S4**

| Parameters                                 | DMSO             |                     | GW0742            |                     |
|--------------------------------------------|------------------|---------------------|-------------------|---------------------|
|                                            | TMCM             | PPAR $\delta^{+/-}$ | TMCM              | PPAR $\delta^{+/-}$ |
| Heart Rate (BPM)                           | 372.3 $\pm$ 13.2 | 410.2 $\pm$ 28.53   | 401.0 $\pm$ 14.3  | 380.2 $\pm$ 13.6    |
| Endocardial Area; d (mm <sup>2</sup> )     | 27.71 $\pm$ 1.43 | 28.26 $\pm$ 1.43    | 26.21 $\pm$ 1.20  | 26.20 $\pm$ 1.15    |
| Endocardial Area; s (mm <sup>2</sup> )     | 21.38 $\pm$ 1.10 | 22.79 $\pm$ 1.31    | 19.27 $\pm$ 1.23  | 20.54 $\pm$ 0.98    |
| Endocardial Major; d (mm)                  | 7.79 $\pm$ 0.22  | 8.04 $\pm$ 0.23     | 7.80 $\pm$ 0.28   | 7.66 $\pm$ 0.21     |
| Endocardial Major; s (mm)                  | 7.35 $\pm$ 0.23  | 7.72 $\pm$ 0.21     | 7.18 $\pm$ 0.30   | 7.29 $\pm$ 0.20     |
| Epicardial Area; d (mm <sup>2</sup> )      | 42.74 $\pm$ 1.41 | 43.66 $\pm$ 1.60    | 41.04 $\pm$ 1.63  | 40.48 $\pm$ 1.30    |
| Epicardial Area; s (mm <sup>2</sup> )      | 36.89 $\pm$ 1.34 | 39.25 $\pm$ 1.82    | 35.41 $\pm$ 1.93  | 35.44 $\pm$ 1.29    |
| Epicardial Major; d (mm)                   | 8.60 $\pm$ 0.20  | 8.85 $\pm$ 0.21     | 8.53 $\pm$ 0.27   | 8.52 $\pm$ 0.18     |
| Epicardial Major; s (mm)                   | 8.20 $\pm$ 0.20  | 8.60 $\pm$ 0.19     | 8.10 $\pm$ 0.28   | 8.18 $\pm$ 0.17     |
| Endocardial Volume; d ( $\mu$ l)           | 84.07 $\pm$ 6.58 | 84.74 $\pm$ 6.32    | 75.05 $\pm$ 4.80  | 76.49 $\pm$ 5.12    |
| Endocardial Volume; s ( $\mu$ l)           | 53.02 $\pm$ 3.93 | 57.60 $\pm$ 5.38    | 44.22 $\pm$ 4.17  | 49.58 $\pm$ 3.80    |
| Endocardial Stroke Volume ( $\mu$ l)       | 31.05 $\pm$ 2.76 | 27.14 $\pm$ 2.11    | 30.83 $\pm$ 1.60  | 26.91 $\pm$ 1.86    |
| Endocardial EF (%)                         | 36.81 $\pm$ 0.74 | 32.34 $\pm$ 2.20    | 41.72 $\pm$ 2.06* | 35.38 $\pm$ 1.55*   |
| Endocardial FAC (%)                        | 22.85 $\pm$ 0.49 | 19.41 $\pm$ 1.59*   | 26.82 $\pm$ 1.72* | 21.64 $\pm$ 1.29*   |
| Endocardial Area Change (mm <sup>2</sup> ) | 6.34 $\pm$ 0.37  | 5.47 $\pm$ 0.47     | 6.94 $\pm$ 0.40   | 5.66 $\pm$ 0.39*    |
| Endocardial CO (ml/min)                    | 11.63 $\pm$ 1.24 | 10.99 $\pm$ 1.19    | 12.45 $\pm$ 0.96  | 10.31 $\pm$ 0.91    |

\*: indicates a p-value of  $p < 0.05$  (PPAR $\delta^{+/-}$  vs. TMCM or DMSO vs. GW0742 for the TMCM group)
